# Supplementary material
Source: PubMed Central journal article supplement (PMC7774250)
Supplement: ao0c05546_si_001.pdf [file ao0c05546_si_001.pdf]

## Supporting Information

# Synthesis and Cytotoxic Evaluation of Sanjoseolide and Representative Analogues

Tian Tian,<sup>\*,#,1</sup> Zhiming Zhu,<sup>#,1</sup> Yalong Ding,<sup>1</sup> Guoli Li,<sup>1</sup> Nan Li<sup>1</sup> and Tong Shen<sup>\*,1</sup>

<sup>1</sup> School of Chemical and Biological Engineering, Lanzhou Jiaotong University, Lanzhou Gansu 730070, P. R. China

<sup>#</sup> These authors contributed equally.

## Table of contents

1. <sup>1</sup>H and <sup>13</sup>C NMR spectra of 1-11
2. Growth inhibition rate curve
3. HPLC Spectra of the Compound 6

## 1. $^1\text{H}$ and $^{13}\text{C}$ NMR spectra of 1-11

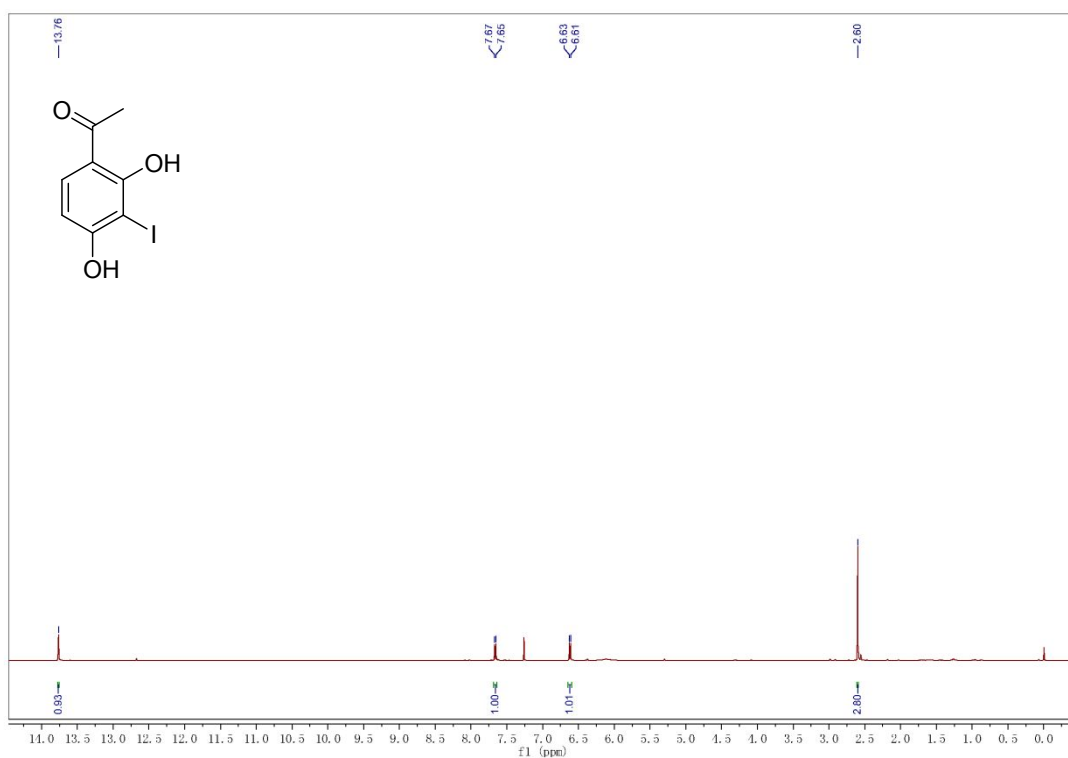

Figure S1:  $^1\text{H}$  NMR spectrum of **3** (500 MHz,  $\text{CDCl}_3$ )

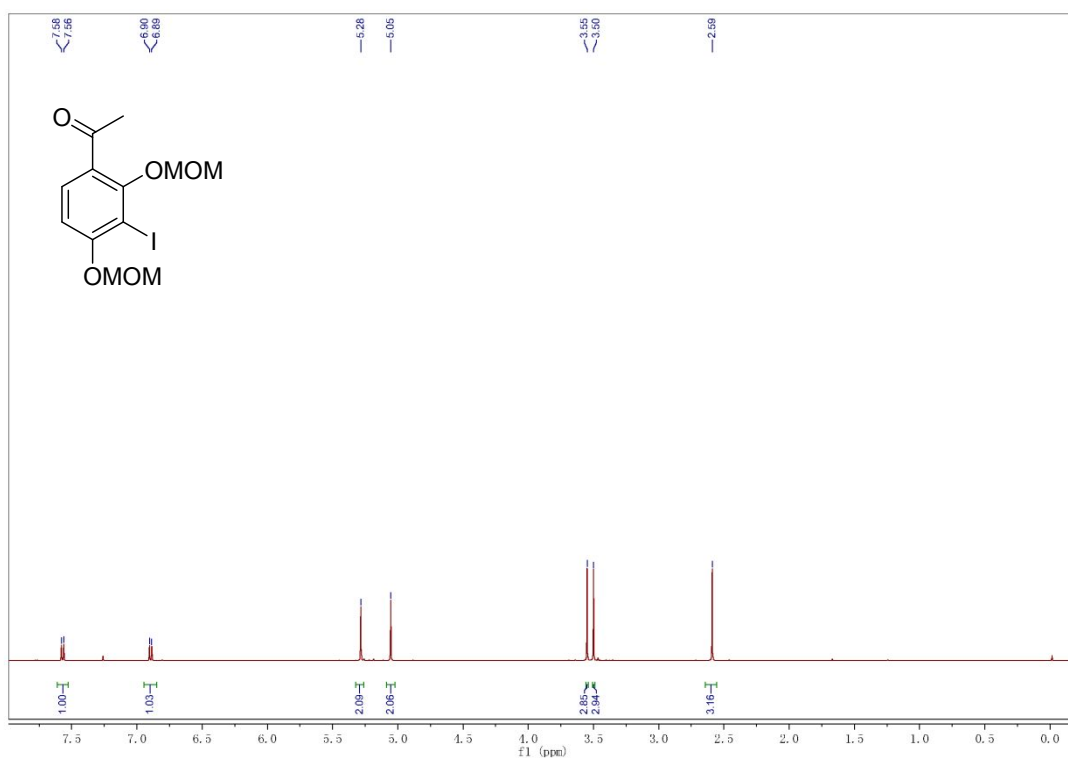

Figure S2:  $^1\text{H}$  NMR spectrum of **4** (500 MHz,  $\text{CDCl}_3$ )

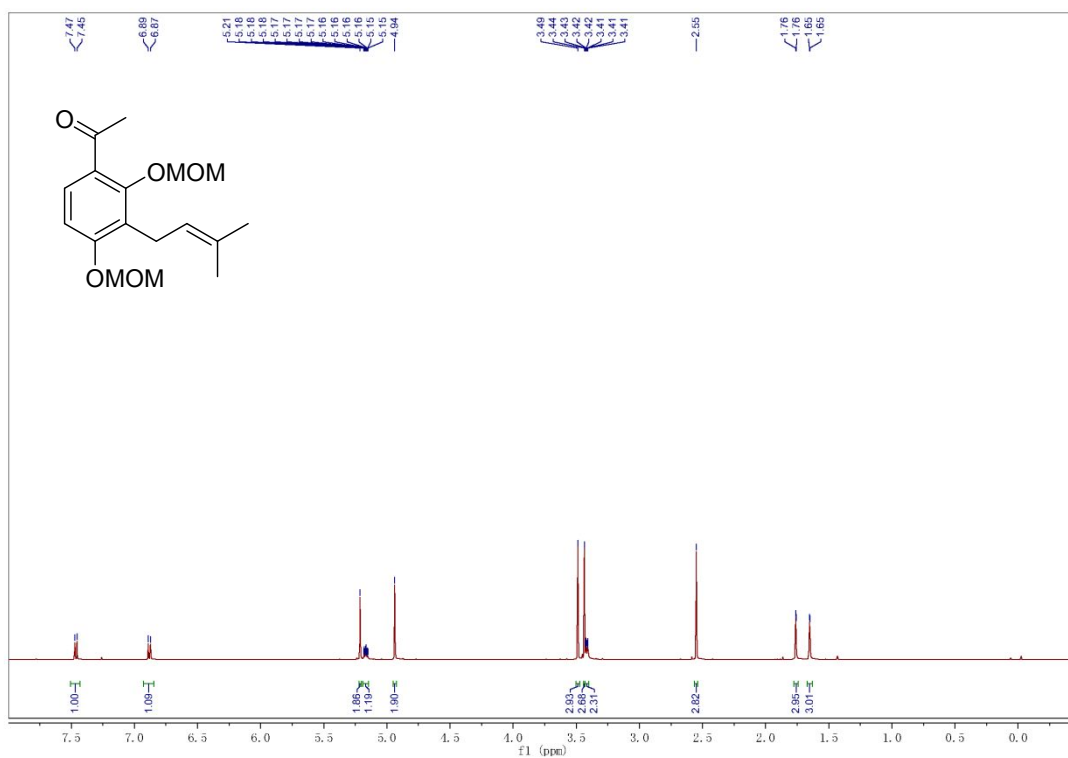

Figure S3:  $^1\text{H}$  NMR spectrum of **5** (500 MHz,  $\text{CDCl}_3$ )

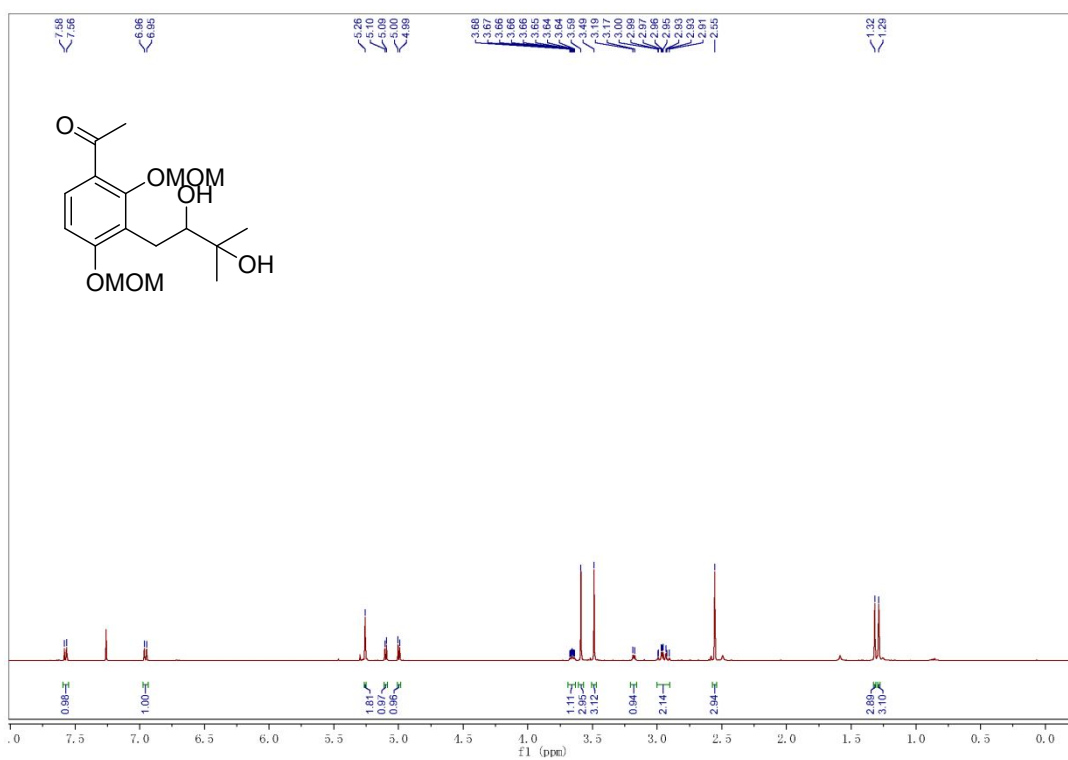

Figure S4:  $^1\text{H}$  NMR spectrum of **6** (500 MHz,  $\text{CDCl}_3$ )

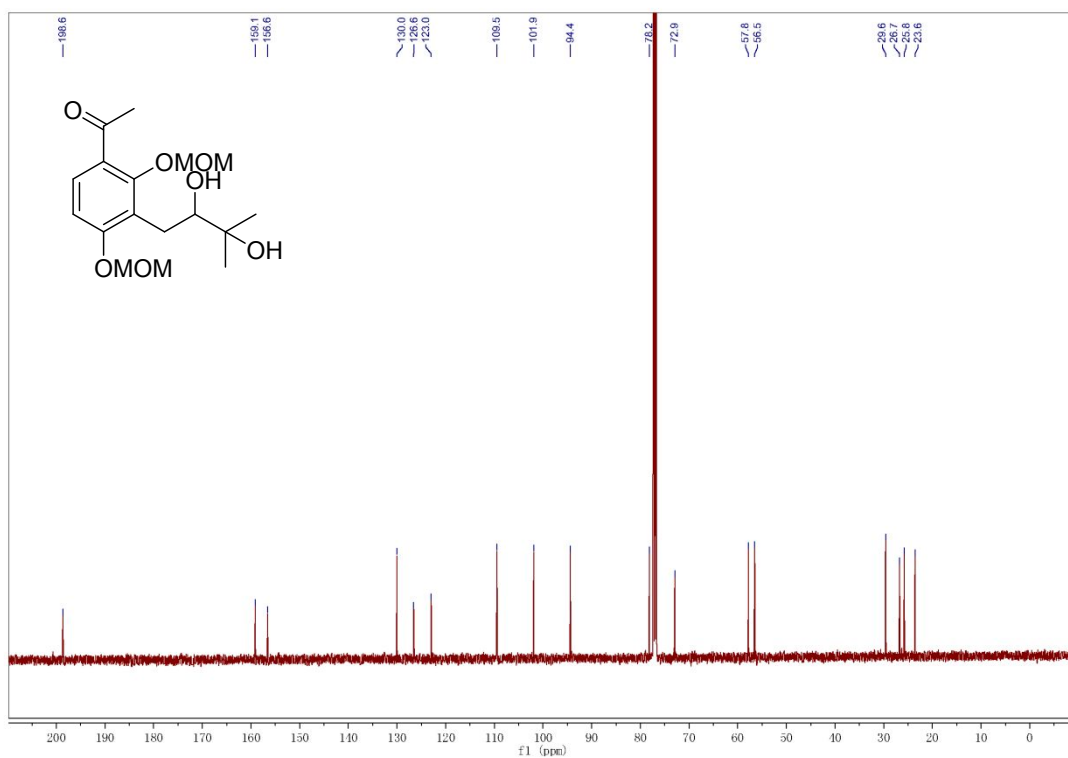

Figure S5:  $^{13}\text{C}$  NMR spectrum of 6 (125 MHz,  $\text{CDCl}_3$ )

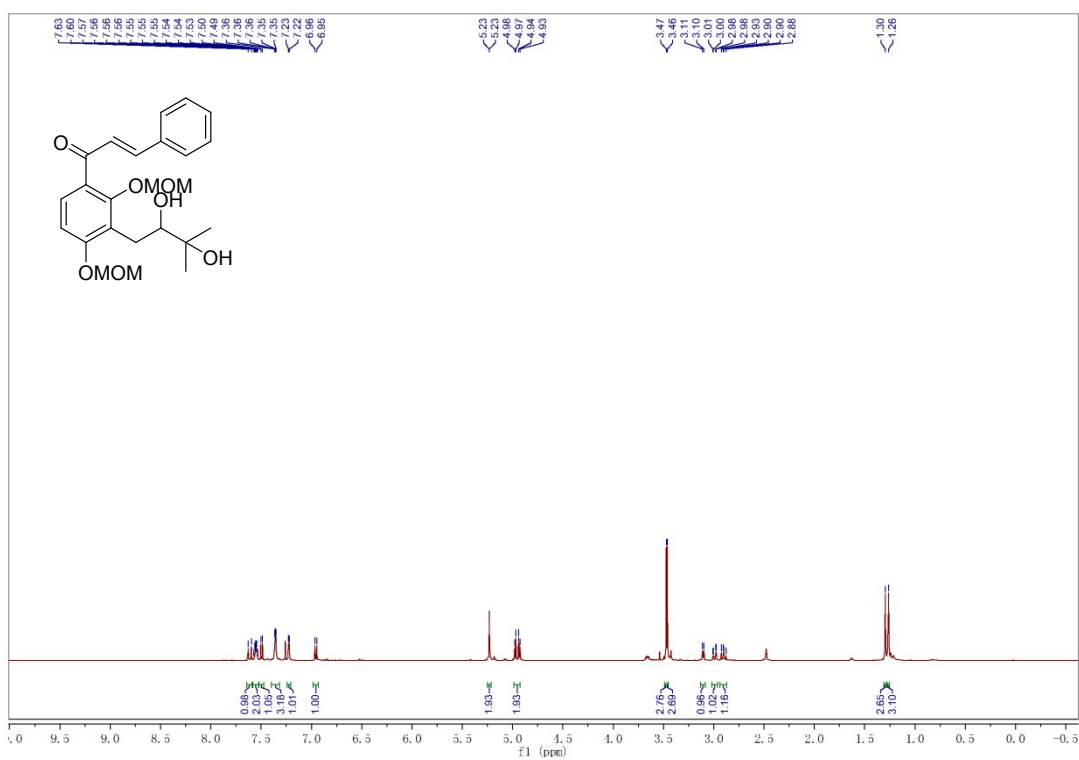

Figure S6:  $^1\text{H}$  NMR spectrum of 7a (500 MHz,  $\text{CDCl}_3$ )

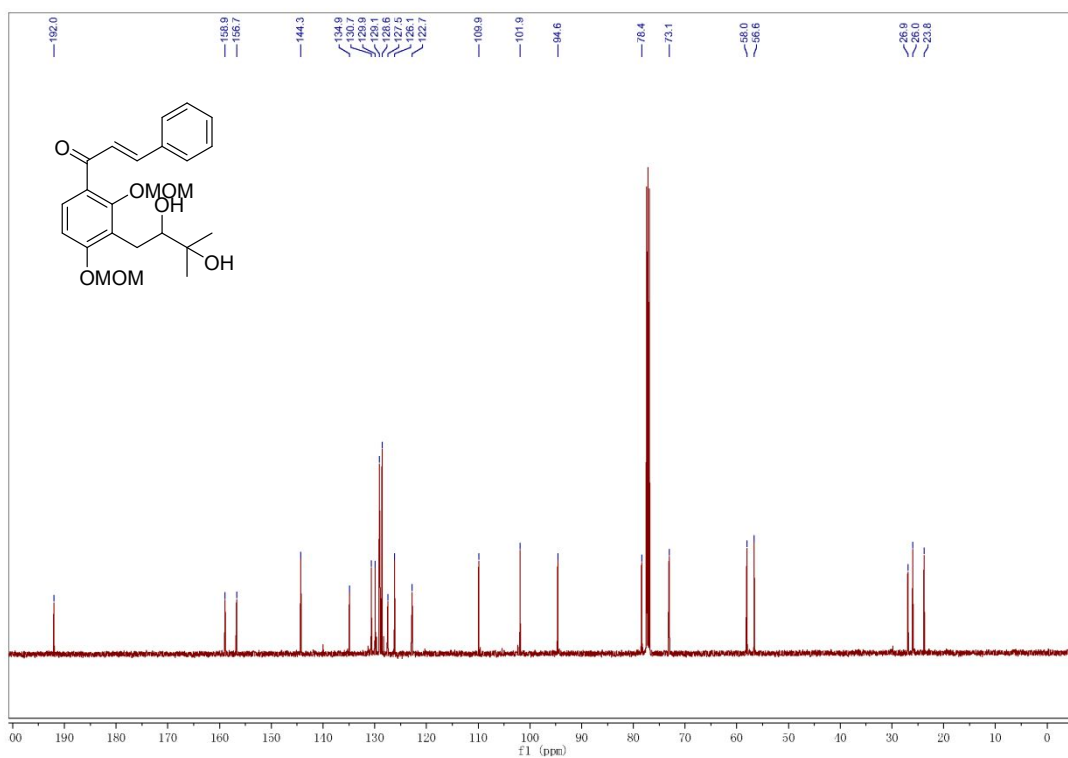

Figure S7: <sup>13</sup>C NMR spectrum of 7a (125 MHz, CDCl<sub>3</sub>)

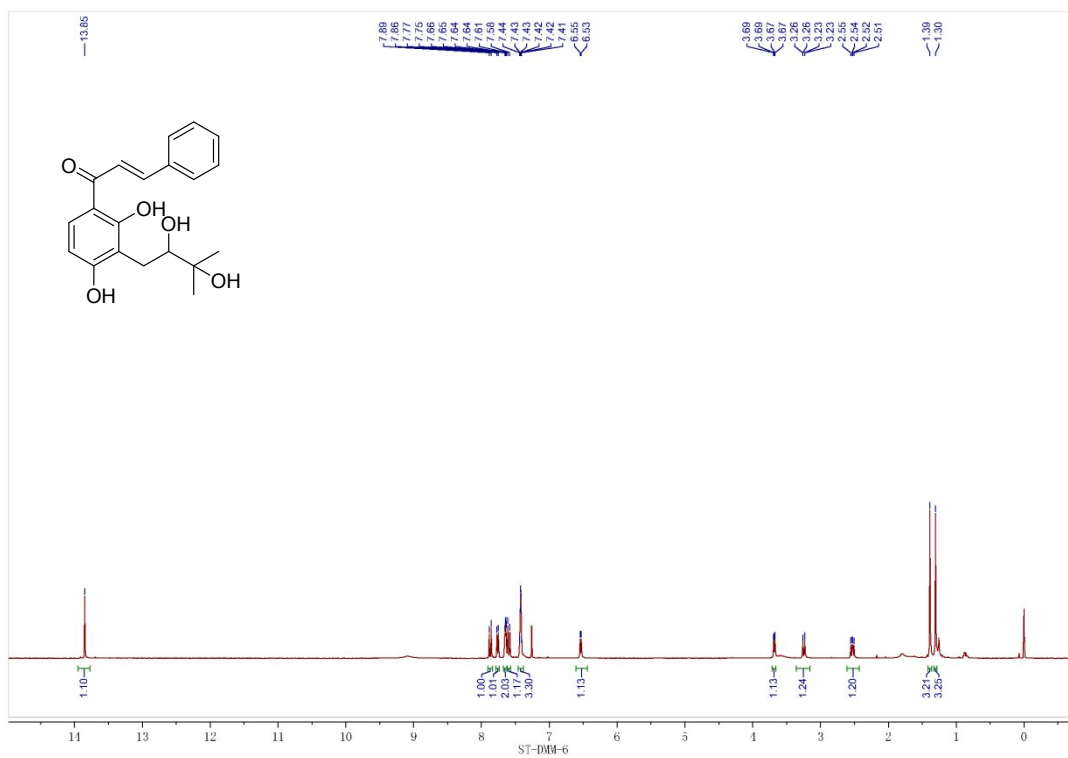

Figure S8: <sup>1</sup>H NMR spectrum of 1 (500 MHz, CDCl<sub>3</sub>)

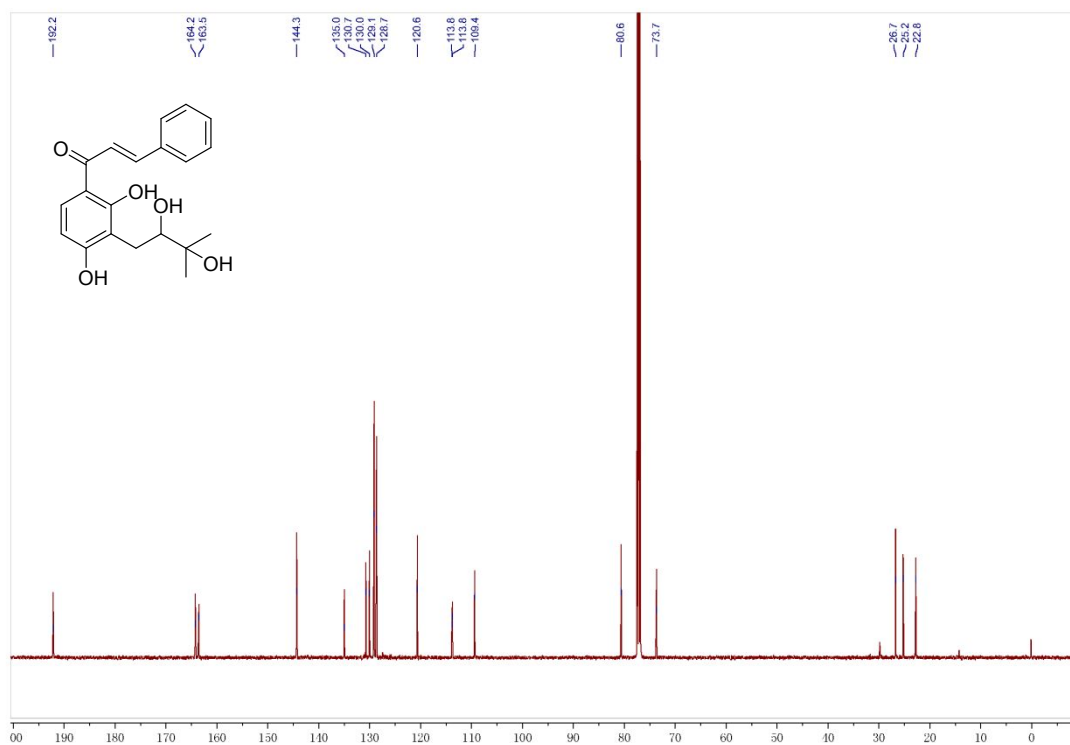

Figure S9: <sup>13</sup>C NMR spectrum of **1** (125 MHz, CDCl<sub>3</sub>)

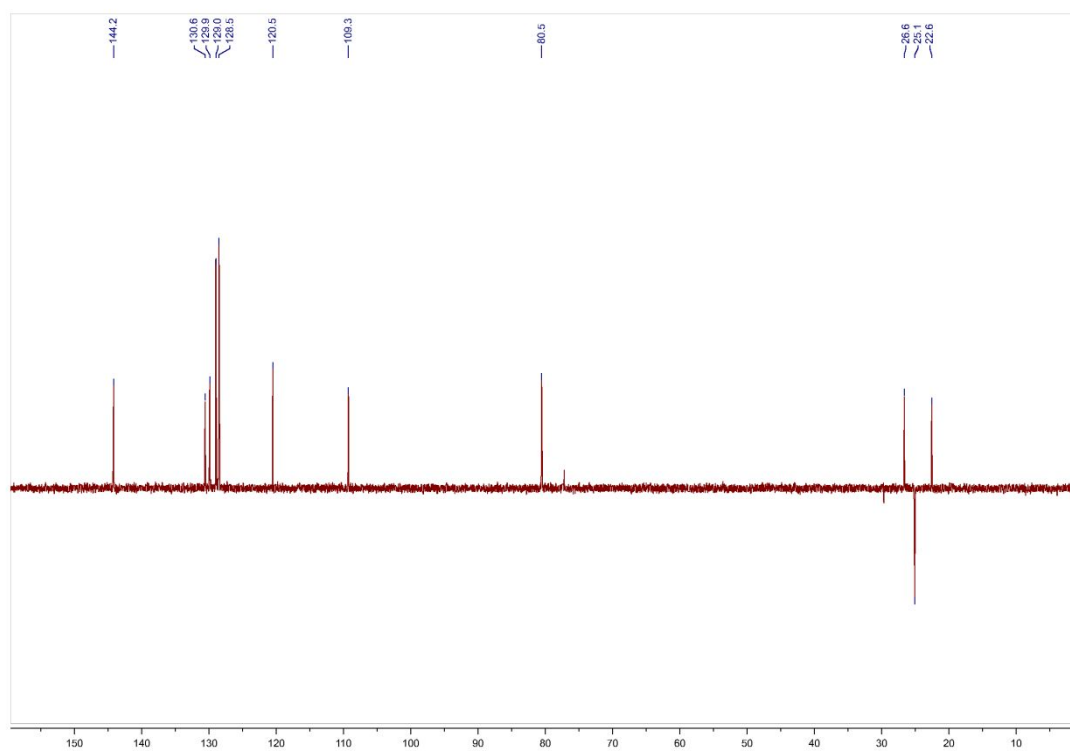

Figure S10: DEPT135 spectrum of **1** in CDCl<sub>3</sub>

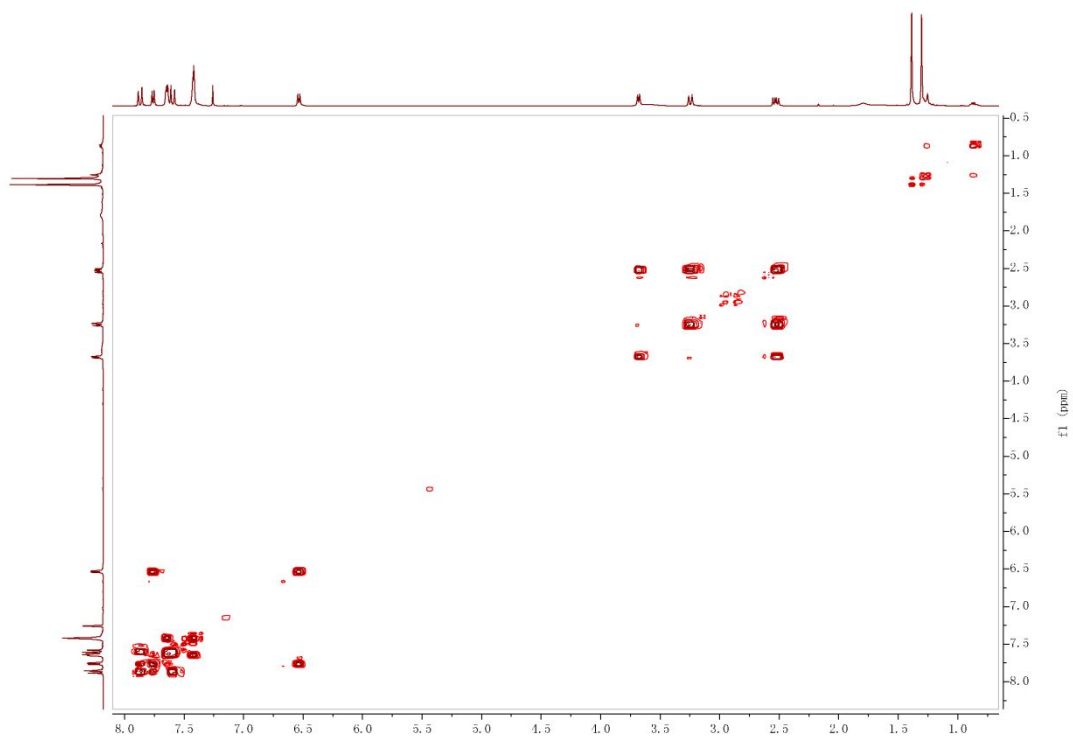

Figure S11:  $^1\text{H}$ - $^1\text{H}$  COSY spectrum of **1** in  $\text{CDCl}_3$

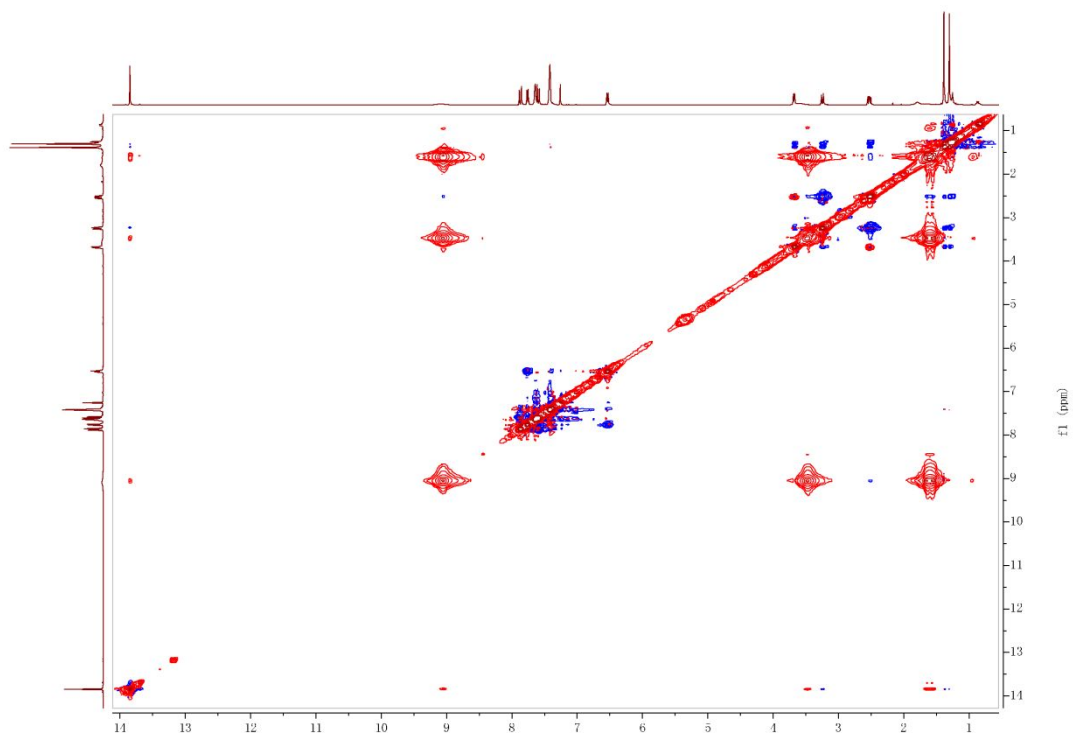

Figure S12: NOESY spectrum of **1** in  $\text{CDCl}_3$

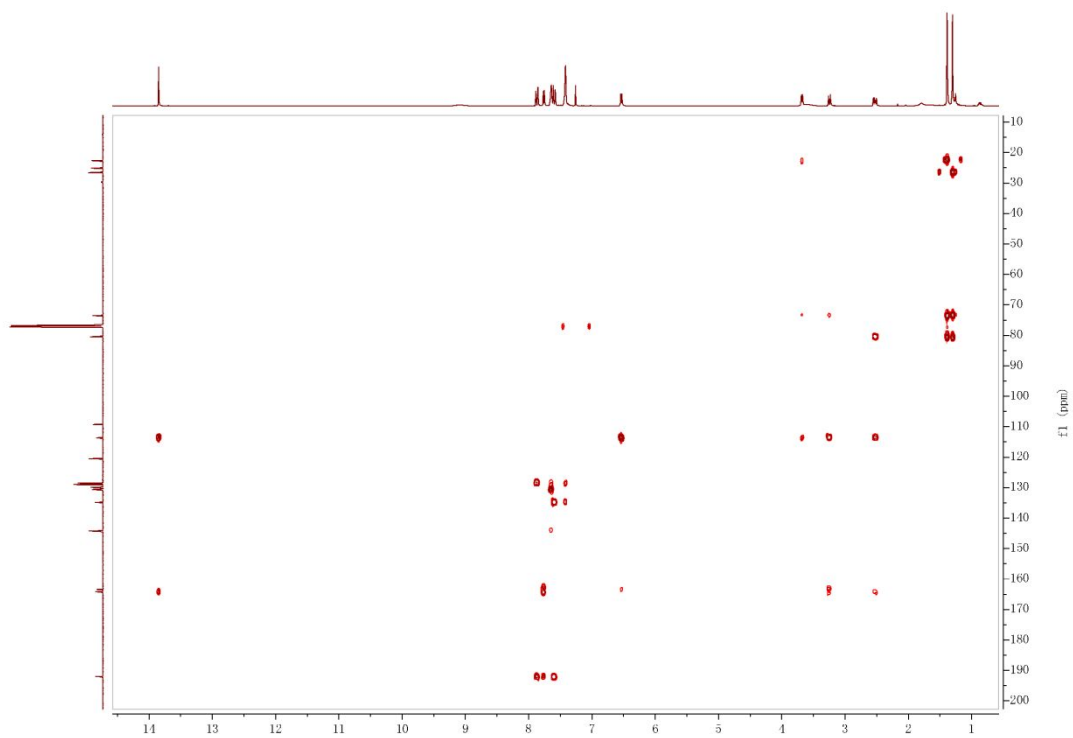

Figure S13: HMBC spectrum of **1** in CDCl<sub>3</sub>

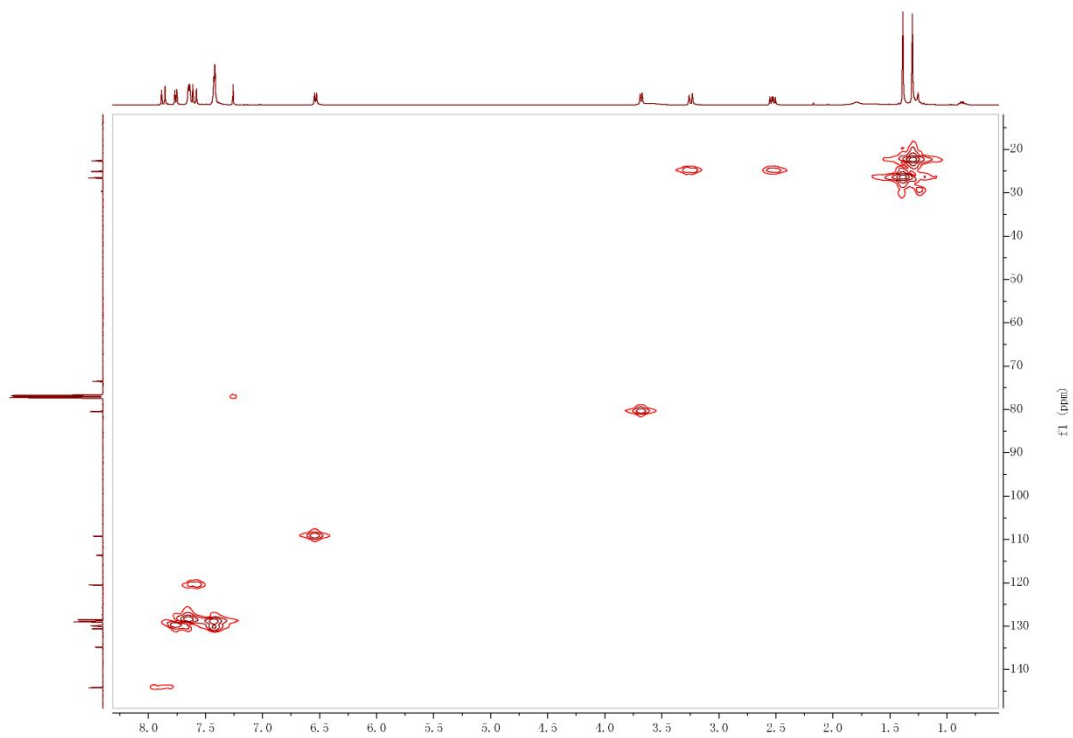

Figure S14: HMQC spectrum of **1** in CDCl<sub>3</sub>



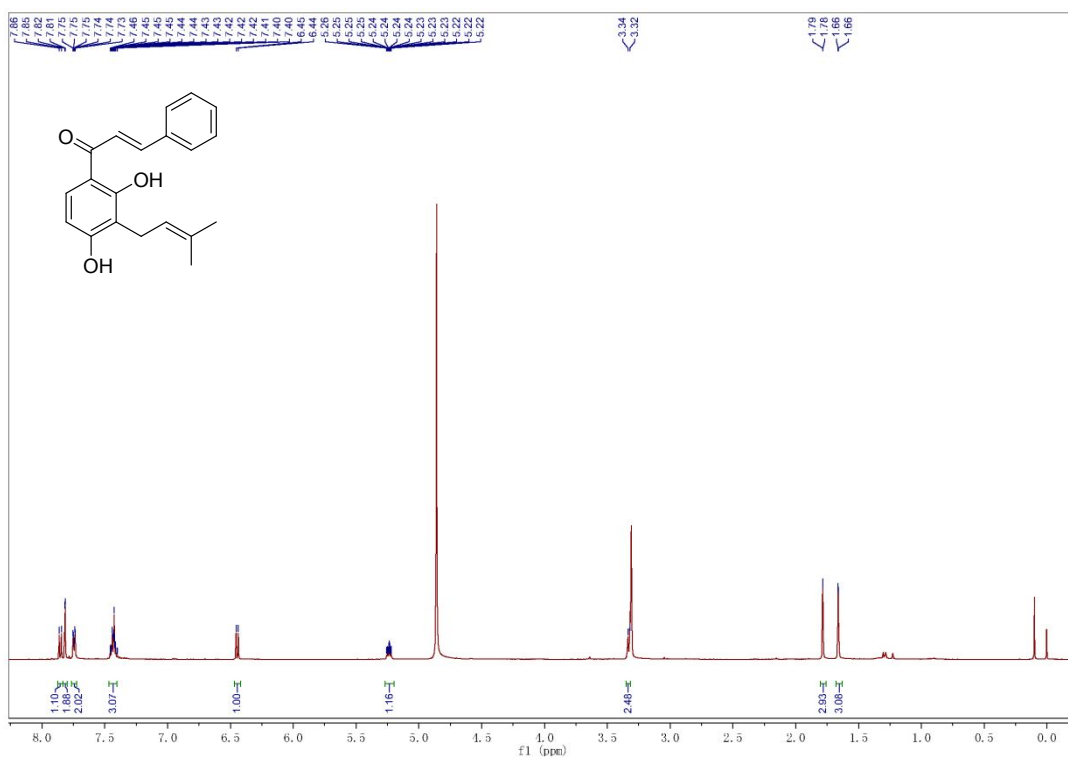

Figure S15:  $^1\text{H}$  NMR spectrum of **10** (500 MHz,  $\text{CD}_3\text{OD}$ )

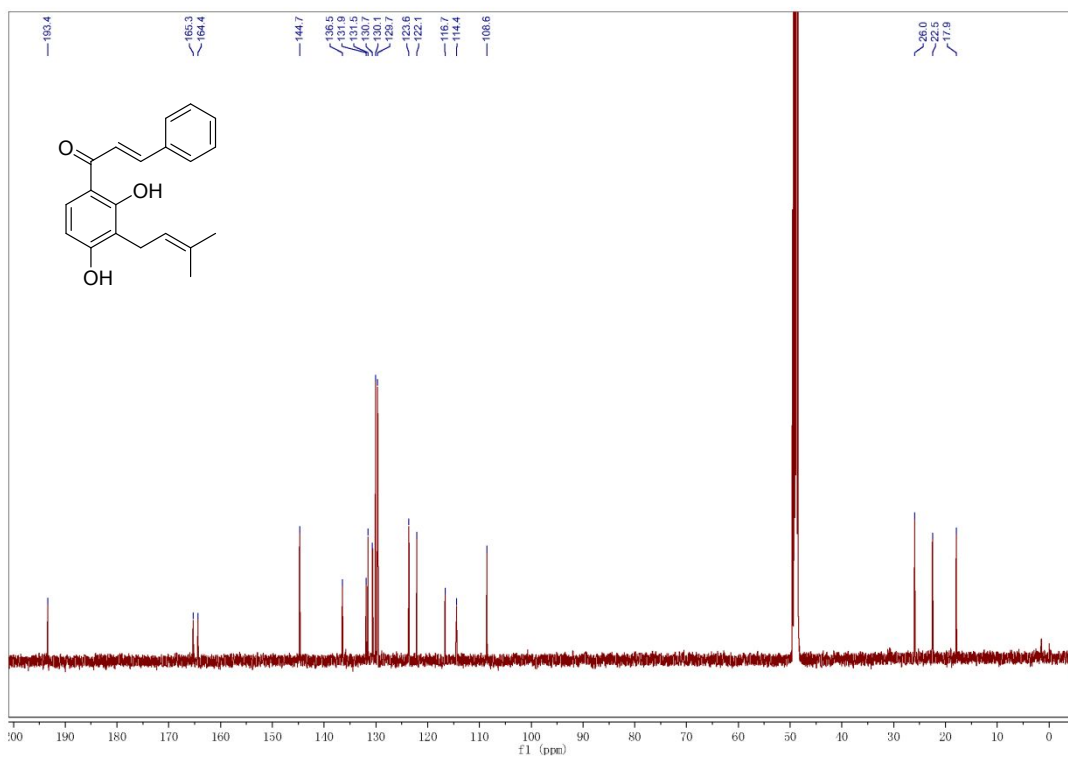

Figure S16:  $^{13}\text{C}$  NMR spectrum of **10** (125 MHz,  $\text{CD}_3\text{OD}$ )

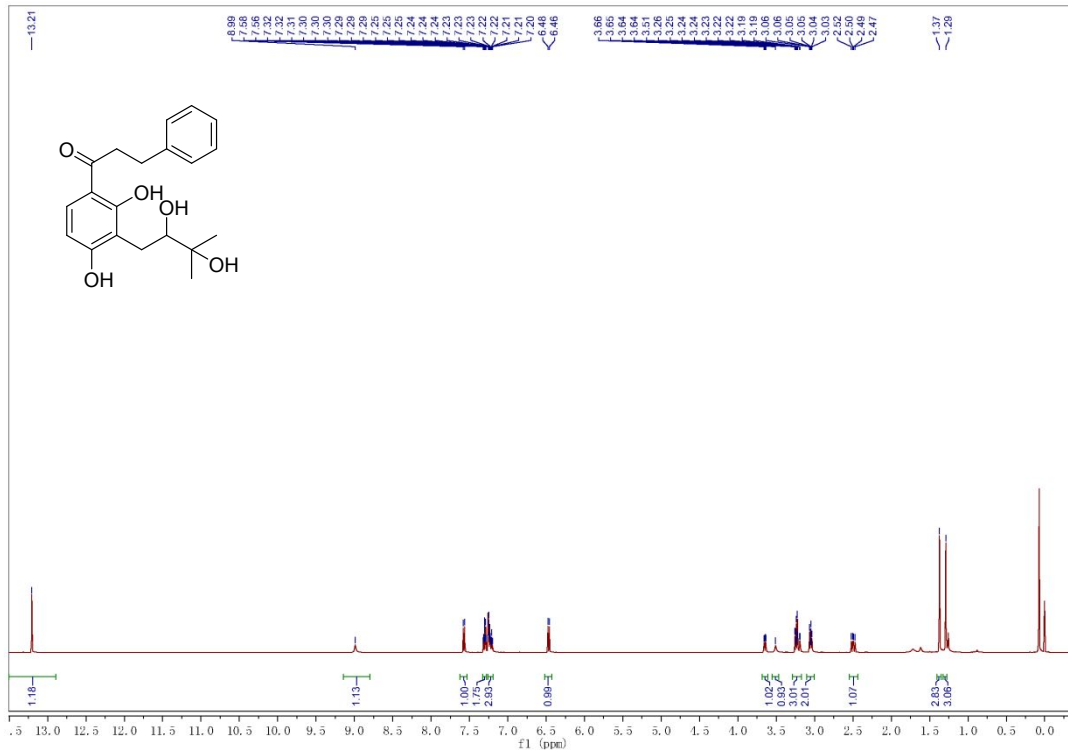

Figure S17: <sup>1</sup>H NMR spectrum of **11** (500 MHz, CDCl<sub>3</sub>)

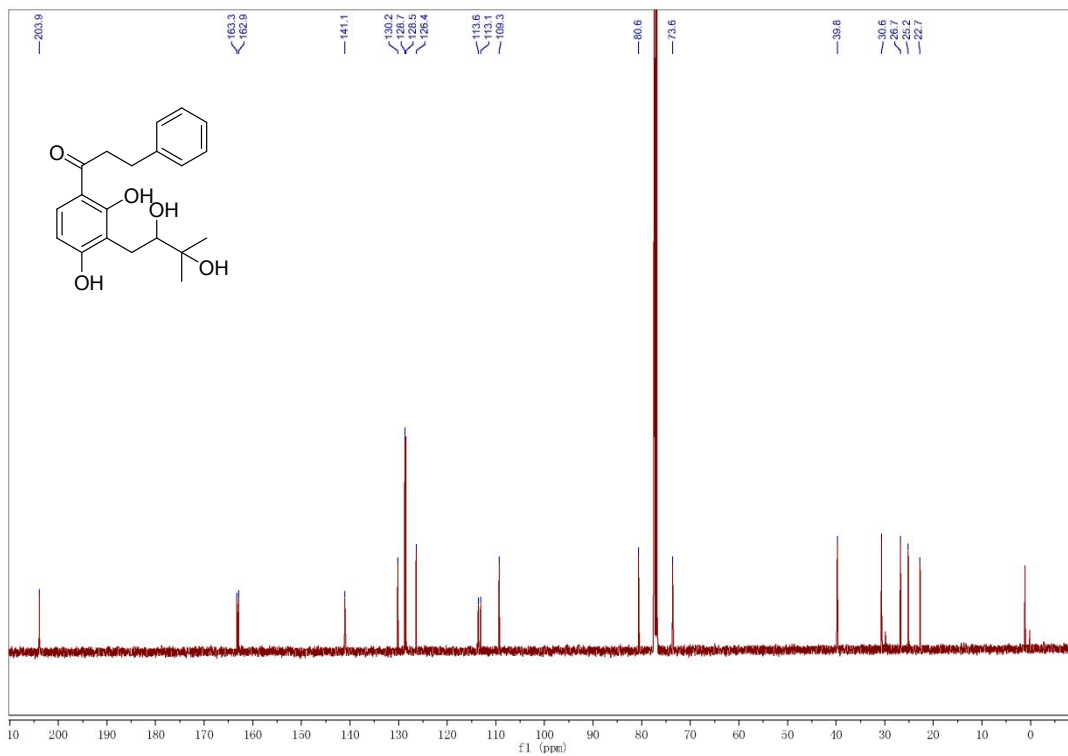

Figure S18: <sup>13</sup>C NMR spectrum of **11** (125 MHz, CDCl<sub>3</sub>)

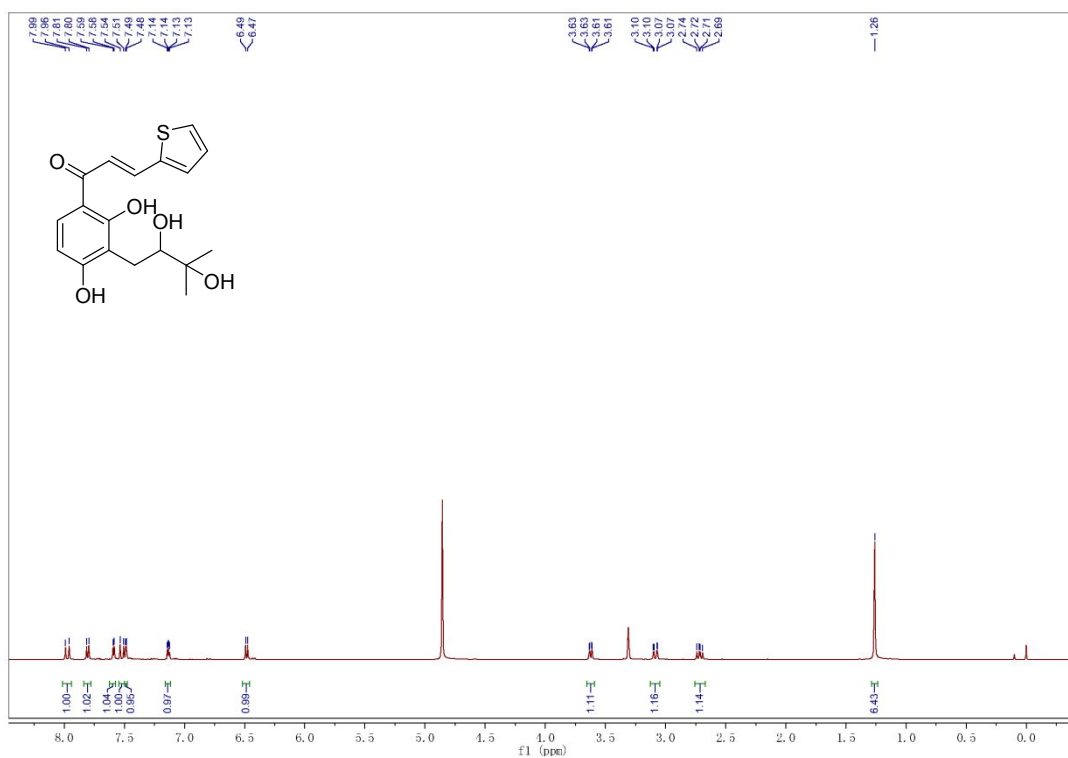

Figure S19: <sup>1</sup>H NMR spectrum of **8b** (500 MHz, CD<sub>3</sub>OD)

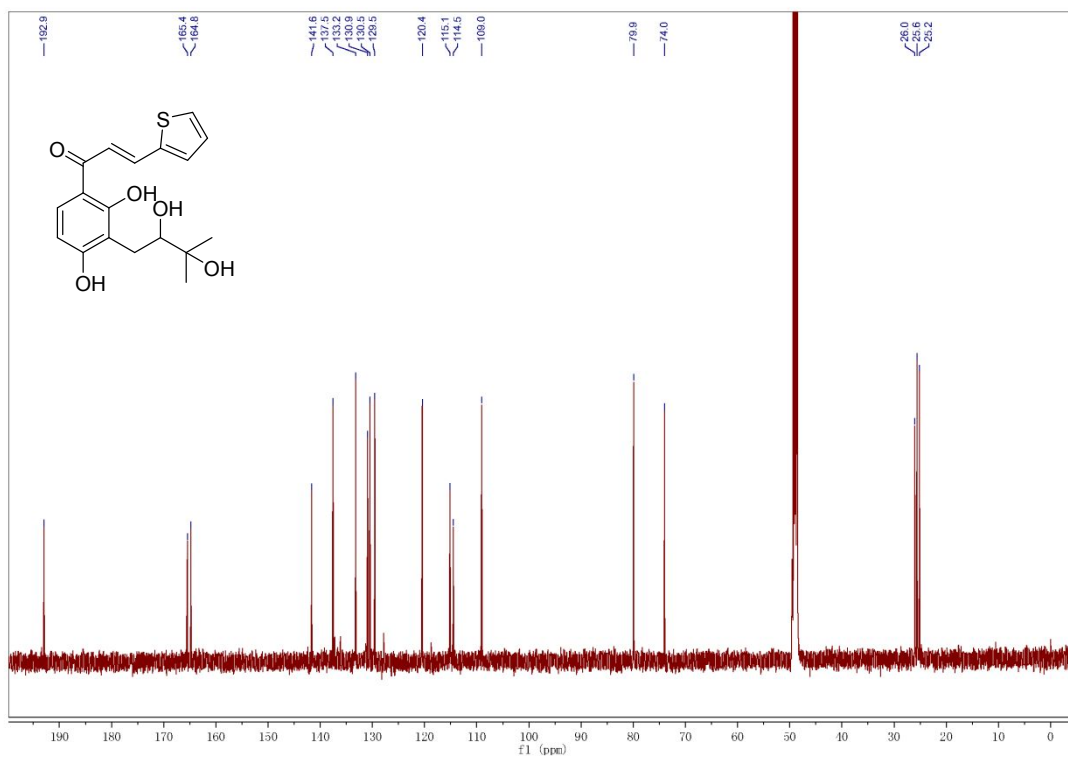

Figure S20: <sup>13</sup>C NMR spectrum of **8b** (125 MHz, CD<sub>3</sub>OD)

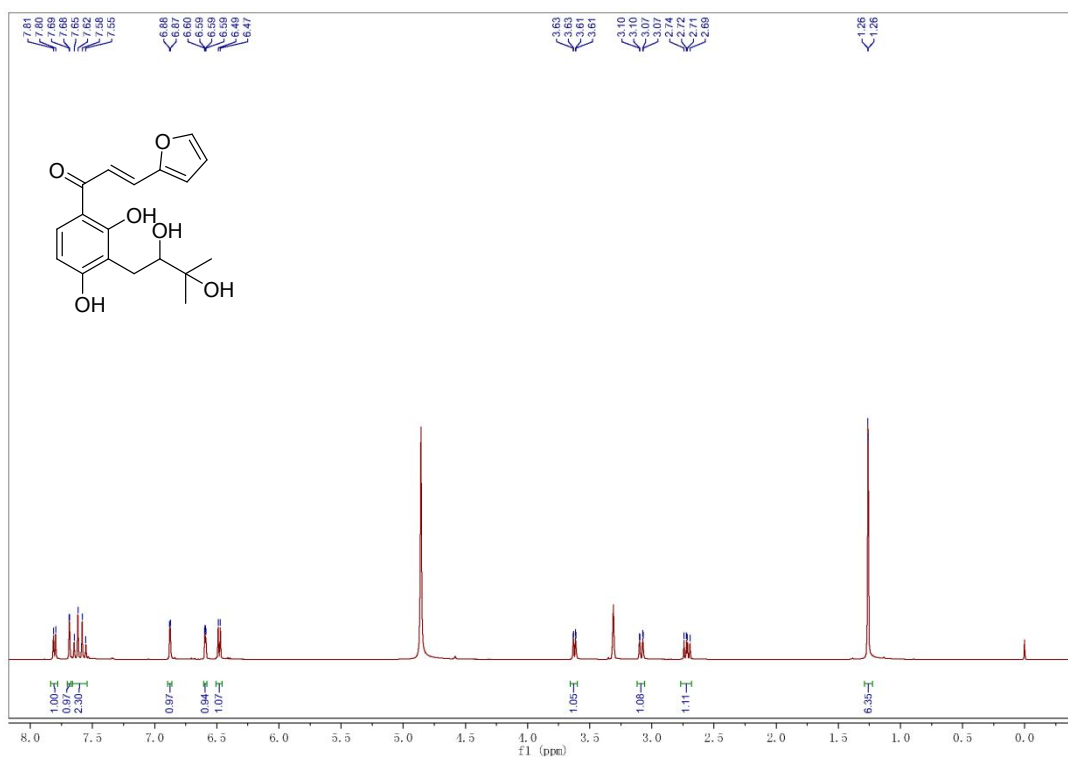

Figure S21: <sup>1</sup>H NMR spectrum of **8c** (500 MHz, CD<sub>3</sub>OD)

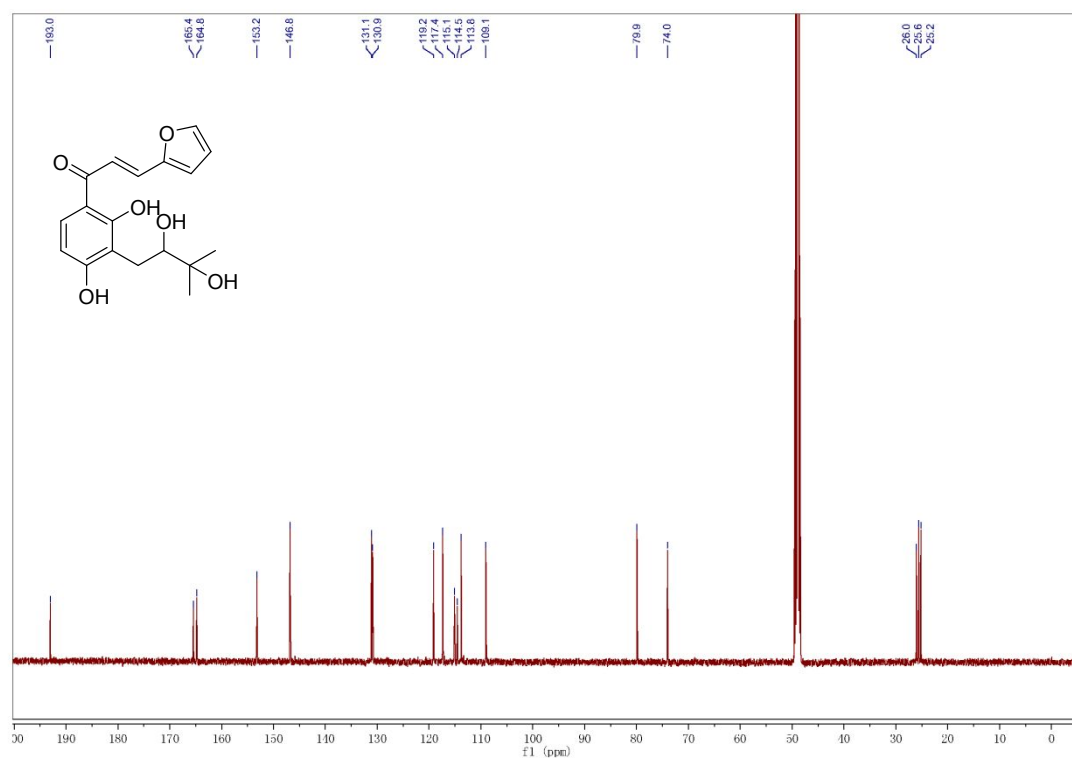

Figure S22: <sup>13</sup>C NMR spectrum of **8c** (125 MHz, CD<sub>3</sub>OD)

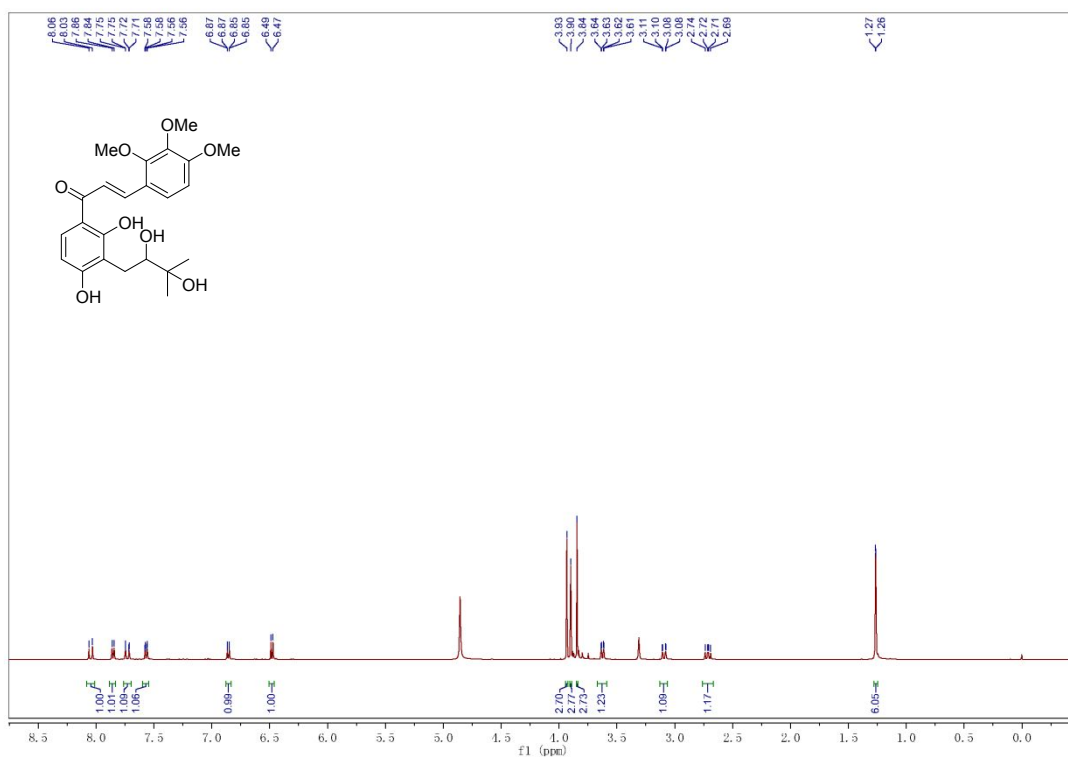

Figure S23: <sup>1</sup>H NMR spectrum of **8d** (500 MHz, CD<sub>3</sub>OD)

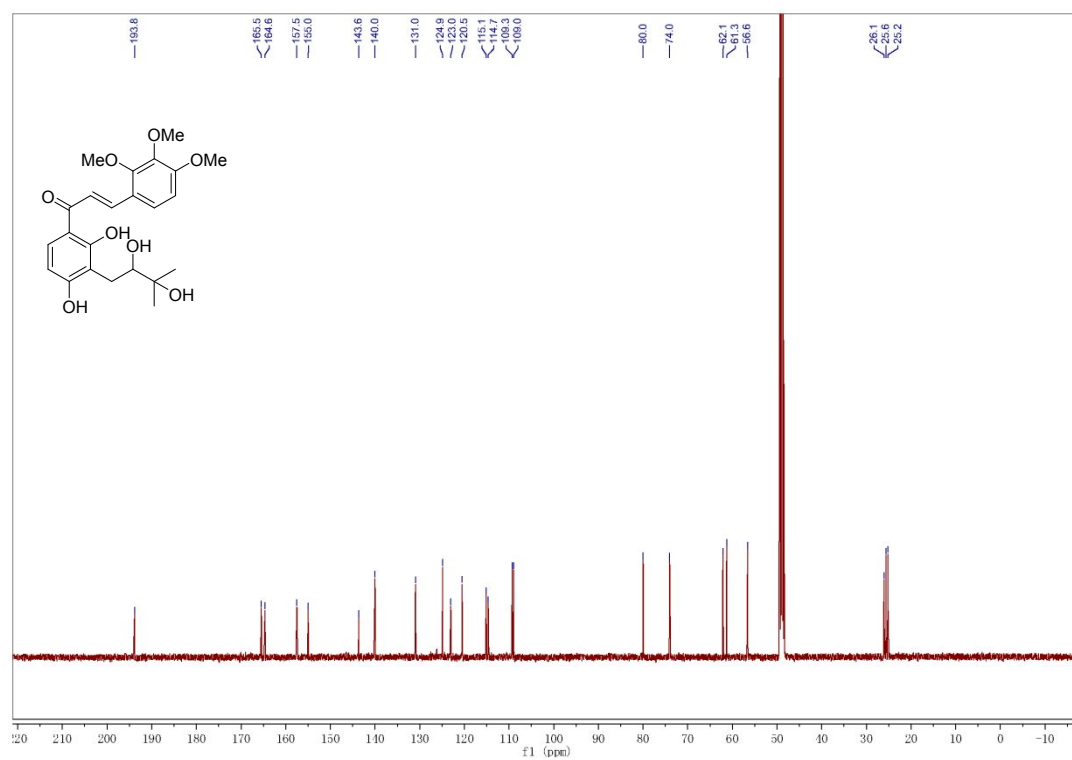

Figure S24: <sup>13</sup>C NMR spectrum of **8d** (125 MHz, CD<sub>3</sub>OD)

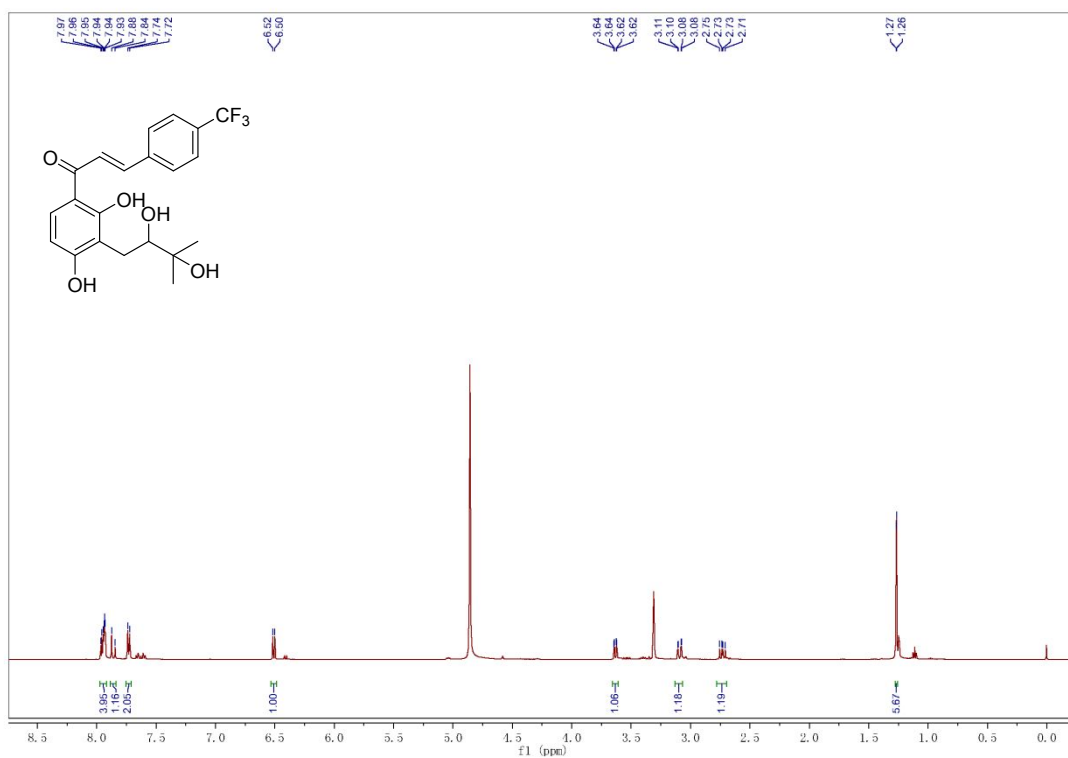

Figure S25: <sup>1</sup>H NMR spectrum of **8e** (500 MHz, CD<sub>3</sub>OD)

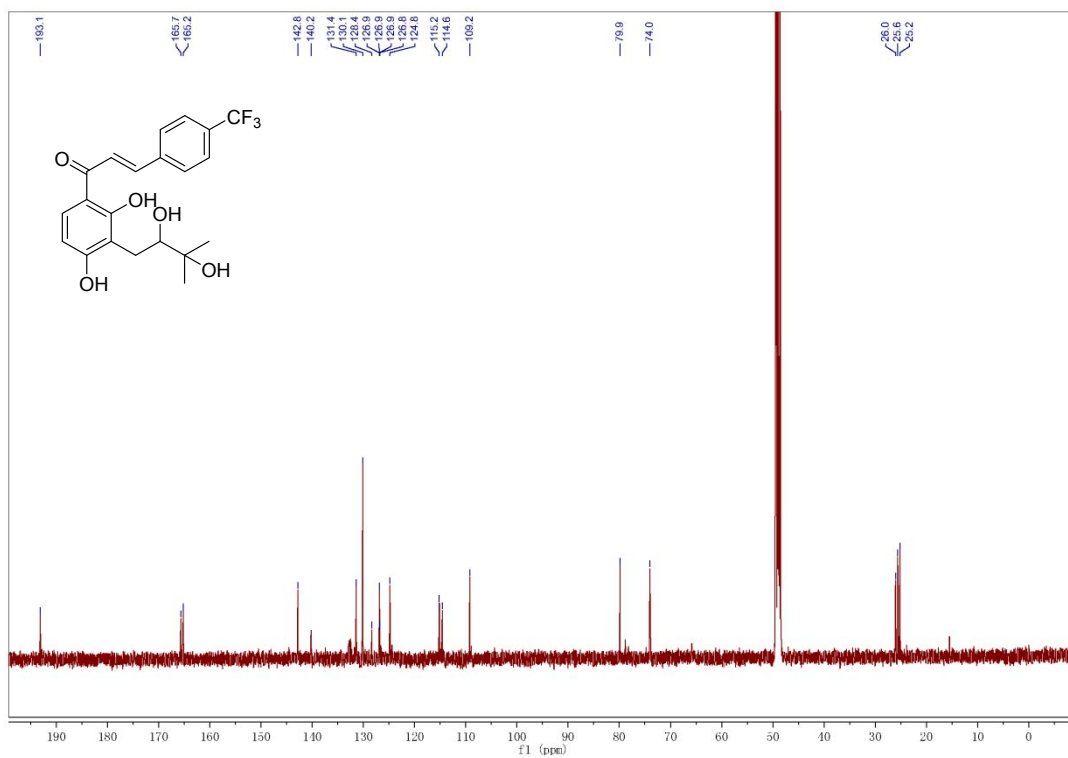

Figure S26: <sup>13</sup>C NMR spectrum of **8e** (125 MHz, CD<sub>3</sub>OD)

## 2. Growth inhibition rate curve

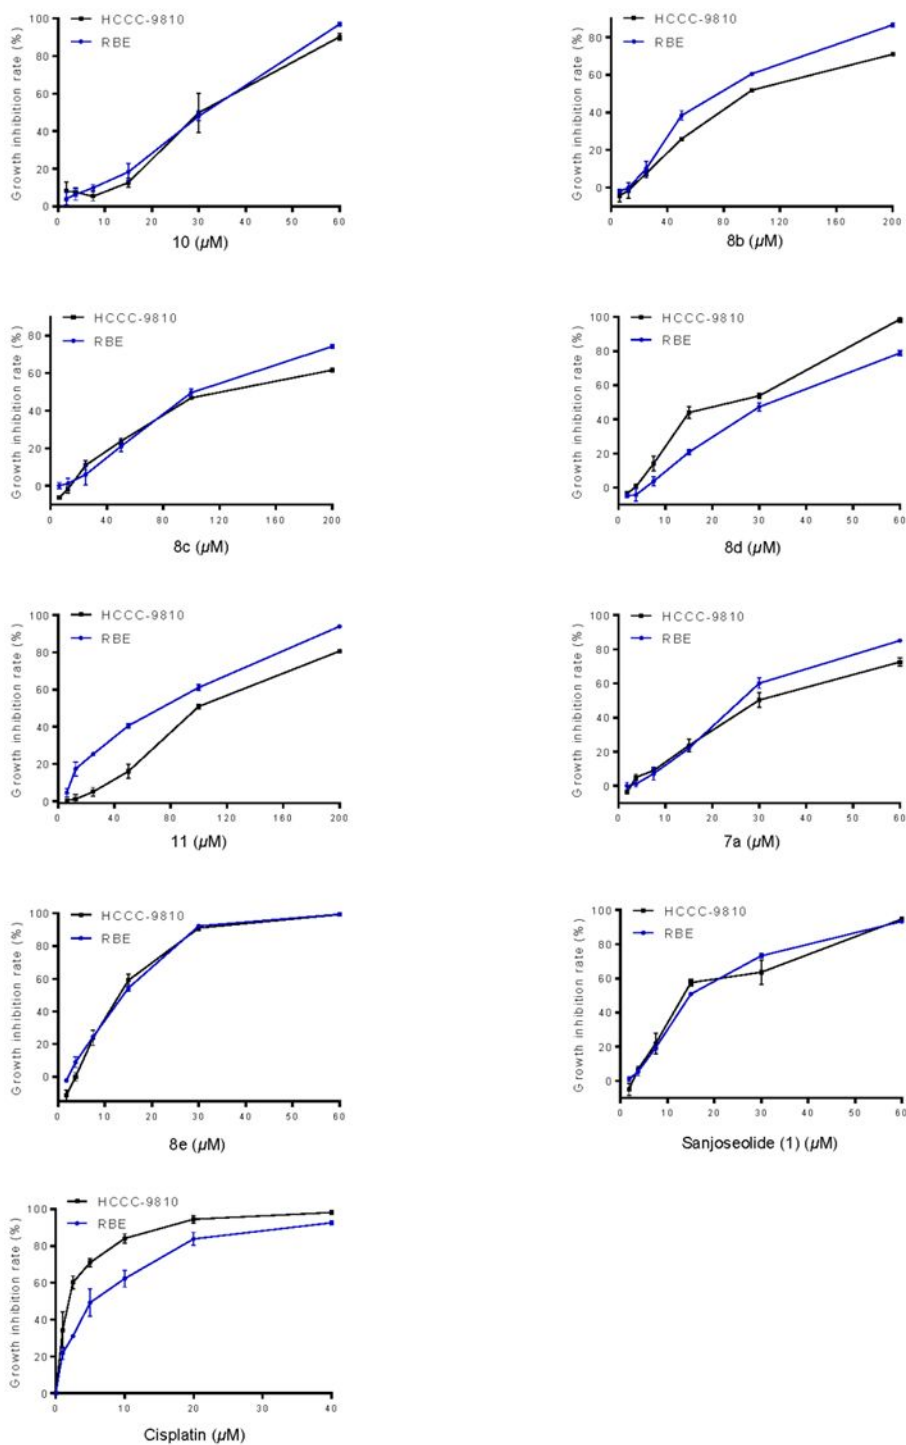

Figure S27: Growth inhibition rate curve of sanjoseolide (1) and their derivatives

### 3. HPLC spectra of Compound *rac*-6 and 6:

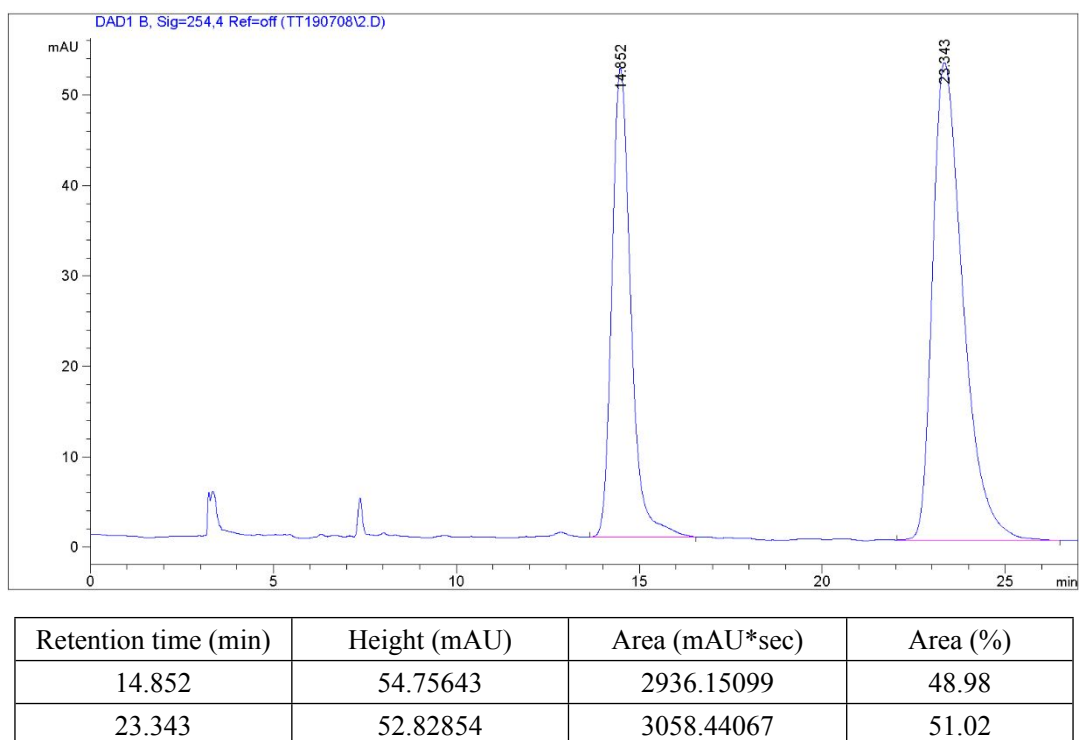

Figure S28: HPLC spectra of Compound *rac*-6

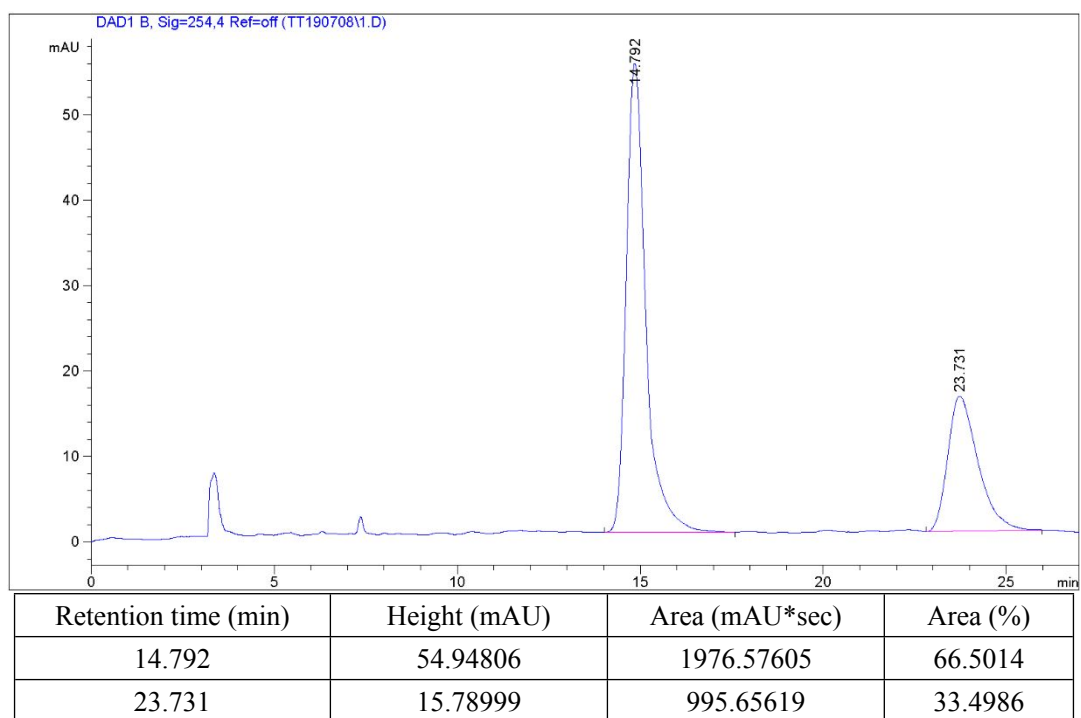

Figure S29: HPLC spectra of Compound 6
